# Supplementary material for: Transfer hydrogenation of cellulose to sugar alcohols over supported ruthenium catalysts
Source: Royal Society of Chemistry journal article supplement (doi:10.1039/c0cc04311g), 2010-12-16
Supplement: c0cc04311g.pdf [file c0cc04311g.pdf]

### *Supporting Information*

## Transfer hydrogenation of cellulose to sugar alcohols over supported ruthenium catalysts

Hirokazu Kobayashi, Hisateru Matsuhashi, Tasuku Komanoya, Kenji Hara and  
Atsushi Fukuoka\*

Catalysis Research Centre, Hokkaido University, Kita 21 Nishi 10, Kita-ku, Sapporo 001-0021, Japan  
Division of Chemical Sciences and Engineering, Graduate School of Chemical Sciences and Engineering,  
Hokkaido University, Kita 13 Nishi 8, Kita-ku, Sapporo 060-8628, Japan

\* E-mail: fukuoka@cat.hokudai.ac.jp, Fax: +81 11 706 9139

### **Reaction Procedure**

Cellulose (Merck, Avicel) was milled using ZrO<sub>2</sub> balls at 60 rpm for 4 days as the pre-treatment. Transfer hydrogenation of cellulose was carried out in a stainless steel (SUS316) high-pressure reactor (OM Lab-Tech MMJ-100, 100 mL). The milled cellulose (324 mg, 1.90 mmol glucose units, containing 4.8 wt% physisorbed water), supported Ru catalyst (50 mg), water (30 mL) and 2-propanol (10 mL) were charged in the reactor (glucose unit/Ru = 190), and then purged with 1 atm of N<sub>2</sub> or He. The mixture was heated to 463 K and maintained at this temperature for 18 h with stirring at 600 rpm.

### **Analysis methods of products**

The products were separated by centrifugation and decantation, and the water-soluble products were analysed by high-performance liquid chromatography (HPLC; Shimadzu LC10-ATVP, refractive index detector). The columns used in this work were a Phenomenex Rezex RPM-Monosaccharide Pb++ column ( $\phi 7.8 \times 300$  mm, mobile phase: water 0.6 mL min<sup>-1</sup>, 353 K) and a Shodex Sugar SH-1011 column ( $\phi 8 \times 300$  mm, mobile phase: water 0.5 mL min<sup>-1</sup>, 323 K). A typical example is shown in Fig. S1.

### **Characterisation of Ru catalysts**

X-ray diffraction (XRD; Rigaku Miniflex) measurements were conducted using Cu K $\alpha$  radiation and energy dispersive X-ray spectroscopy (EDX; Shimadzu EDX-720) was carried out using Rh target. The electron binding energy of Ru 3p<sub>3/2</sub> was determined by X-ray photoelectron spectroscopy (XPS; JEOL JPC-9010MC). H<sub>2</sub>-temperature programmed reduction (H<sub>2</sub>-TPR) was performed by using Quantachrome CHEMBET-3000 (detector: TCD).

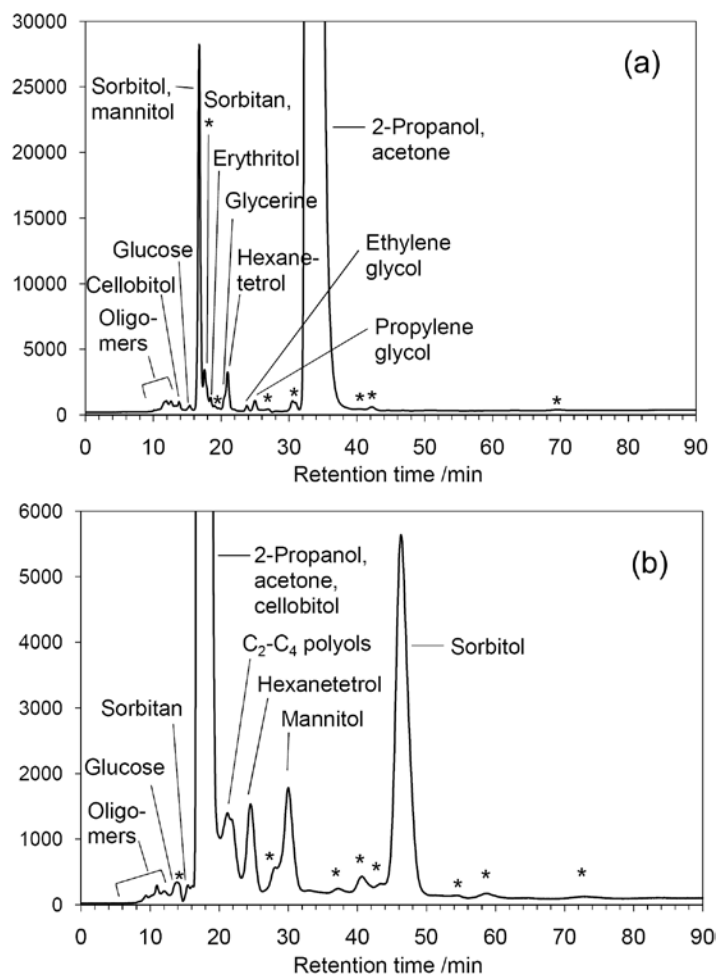

Fig. S1 HPLC analysis for the reaction by Ru/AC(N) catalyst shown in Table 1 entry 3 with (a) a Sugar SH-1011 column and (b) a Rezex RPM-monosaccharide Pb<sup>++</sup> column. The asterisks indicate unidentified products. Cellobitol: 4-*O*- $\beta$ -glucopyranosyl-D-glucitol.

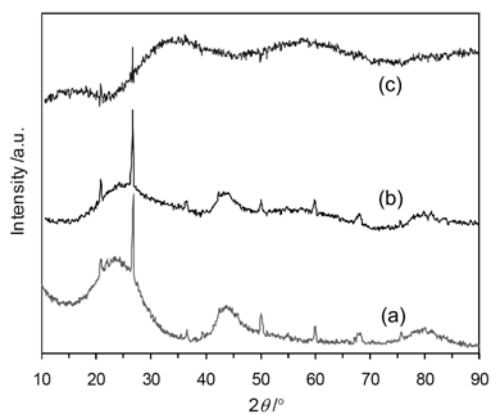

Fig. S2 XRD patterns of (a) AC(N), (b) 10 wt% Ru/AC(N) and (c) the differential pattern of (b)-(a).

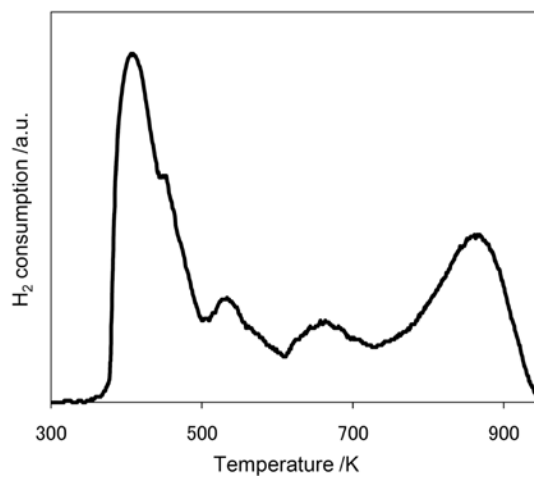

Fig. S3 H<sub>2</sub>-TPR of Ru/AC(N).

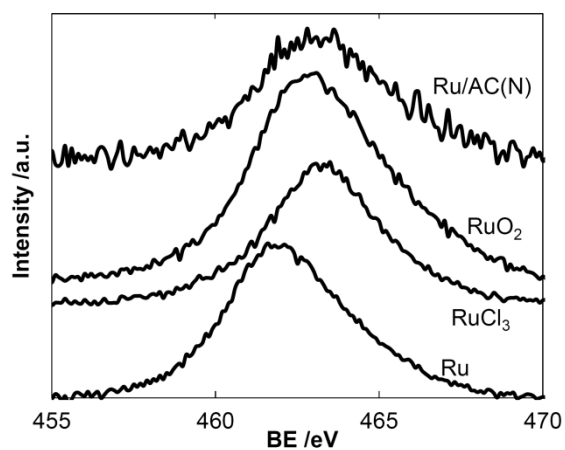

Fig. S4 Ru 3p<sub>3/2</sub> XPS of Ru/AC(N) and standard compounds.

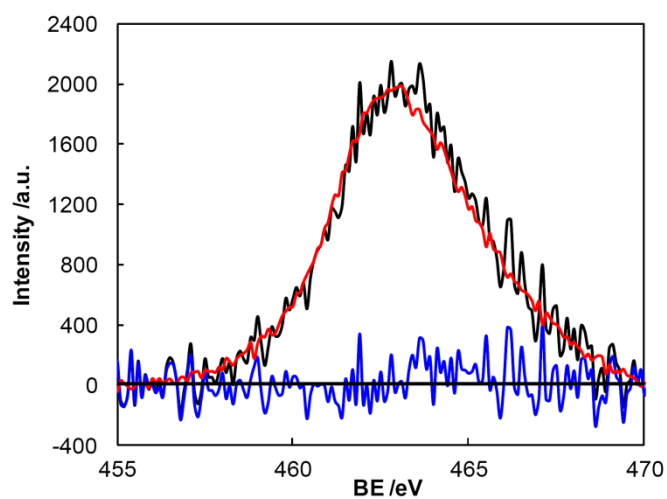

Fig. S5 Curve fitting of Ru 3p<sub>3/2</sub> XPS for Ru/AC(N) using the data of reference compounds. Black line: Ru/AC(N), red line: the fitting curve (sum of 99.7% RuO<sub>2</sub> and 0.3% Ru metal), blue line: the difference between Ru/AC(N) and the fitting curve.

Table S1 Effect of the concentration of 2-propanol on the transfer hydrogenation of cellulose by Ru/AC(N) catalyst.<sup>a</sup>

| Entry | Concentration of 2-propanol /vol% | Yield based on carbon /% |          |                              |          |                                                     |         |                    |                     | Cellulose conv. <sup>e</sup> /% | Yield of acetone /%   |
|-------|-----------------------------------|--------------------------|----------|------------------------------|----------|-----------------------------------------------------|---------|--------------------|---------------------|---------------------------------|-----------------------|
|       |                                   | Sorbitol                 | Mannitol | Sum of sorbitol and mannitol | Sorbitan | C <sub>2</sub> -C <sub>4</sub> polyols <sup>b</sup> | Glucose | 5-HMF <sup>c</sup> | Others <sup>d</sup> |                                 |                       |
| 21    | 0                                 | 0                        | 0        | 0                            | 0        | 0                                                   | 1.6     | 8.8                | 64                  | 74                              | –                     |
| 22    | 5                                 | 3.1                      | 1.0      | 4.1                          | 0        | 0                                                   | 1.5     | 2.9                | 71                  | 79                              | 12 (40) <sup>f</sup>  |
| 23    | 13                                | 31                       | 6.5      | 38                           | 1.2      | 5.7                                                 | 0.7     | 0                  | 30                  | 76                              | 22 (20) <sup>f</sup>  |
| 24    | 20                                | 33                       | 9.6      | 43                           | 1.5      | 4.3                                                 | 0.8     | 0                  | 27                  | 77                              | 16 (20) <sup>f</sup>  |
| 3     | 25                                | 34                       | 9.0      | 43                           | 0.6      | 6.1                                                 | 0.9     | 0                  | 23                  | 74                              | 15 (24) <sup>f</sup>  |
| 25    | 38                                | 24                       | 10       | 34                           | 0.5      | 4.3                                                 | 0.6     | 0                  | 32                  | 71                              | 10 (30) <sup>f</sup>  |
| 26    | 50                                | 21                       | 10       | 31                           | 0.5      | 0                                                   | 1.1     | 0                  | 31                  | 64                              | 8.0 (35) <sup>f</sup> |
| 27    | 75                                | 12                       | 8.5      | 21                           | 0.3      | 0                                                   | 0       | 0                  | 38                  | 59                              | 8.3 (81) <sup>f</sup> |
| 28    | 100                               | 0                        | 0        | 0                            | 0        | 0.4                                                 | 0       | 0                  | 22                  | 22                              | 5.6                   |

<sup>a</sup> Cellulose 324 mg (1.90 mmol), catalyst 50 mg (metal 2 wt%), water + 2-propanol 40 mL, 463 K, 18 h. <sup>b</sup> Sum of erythritol, glycerine, propylene glycol and ethylene glycol. <sup>c</sup> 5-Hydroxymethyl furfural. <sup>d</sup> Others include soluble sugar compounds and unidentified ones. <sup>e</sup> Based on the carbon balance calculated from the weight difference after the reaction. <sup>f</sup> Ratio of acetone yield against the sugar alcohols yield (mol/mol).

Table S2 Screening tests of alcohols on the transfer hydrogenation of cellulose by Ru/AC(N) catalyst.<sup>a</sup>

| Entry | Alcohol    | Yield based on carbon /% |          |                              |          |                                                     |         |                    |                     | Cellulose conv. <sup>e</sup> /% | Yield of aldehyde or ketone /% |
|-------|------------|--------------------------|----------|------------------------------|----------|-----------------------------------------------------|---------|--------------------|---------------------|---------------------------------|--------------------------------|
|       |            | Sorbitol                 | Mannitol | Sum of sorbitol and mannitol | Sorbitan | C <sub>2</sub> -C <sub>4</sub> polyols <sup>b</sup> | Glucose | 5-HMF <sup>c</sup> | Others <sup>d</sup> |                                 |                                |
| 29    | Ethanol    | 0                        | 0        | 0                            | 0        | 0                                                   | 0.2     | 0                  | 70                  | 70                              | N.d.                           |
| 3     | 2-Propanol | 34                       | 9.0      | 43                           | 0.6      | 6.1                                                 | 0.9     | 0                  | 23                  | 74                              | 15 (24) <sup>f</sup>           |
| 30    | Glycerine  | 0.7                      | 0        | 0.7                          | 0        | 0                                                   | 1.0     | 3.2                | 69                  | 74                              | N.d.                           |
| 31    | 2-Butanol  | 3.0                      | 1.5      | 4.5                          | 0        | 5.6                                                 | 1.6     | 0                  | 58                  | 70                              | 24 (300) <sup>f</sup>          |

<sup>a</sup> Cellulose 324 mg (1.90 mmol), catalyst 50 mg (metal 2 wt%), water 30 mL, alcohol 10 mL, 463 K, 18 h. N.d.: Not determined. <sup>b</sup> Sum of erythritol, glycerine, propylene glycol and ethylene glycol. <sup>c</sup> 5-Hydroxymethyl furfural. <sup>d</sup> Others include soluble sugar compounds and unidentified ones. <sup>e</sup> Based on the carbon balance calculated from the weight difference after the reaction. <sup>f</sup> Ratio of the ketone yield against the sugar alcohols yield (mol/mol).
